# Supplementary material for: Noninvasive detection of alarming intracranial pressure changes by auditory monitoring in early management of brain injury: a prospective invasive versus noninvasive study
Source: PubMed Central journal article supplement (PMC5319090; doi:10.1186/s13054-017-1616-2), 2017-02-21
Supplement: 13054_2017_1616_MOESM3_ESM.pdf [file 13054_2017_1616_MOESM3_ESM.pdf]

*Monitoring of ICP in patients who stayed less than 4 days in NICU*

The following panels (A-O) display the time courses of ICP and CM phase in all the patients not shown in Fig.2 in the main text.

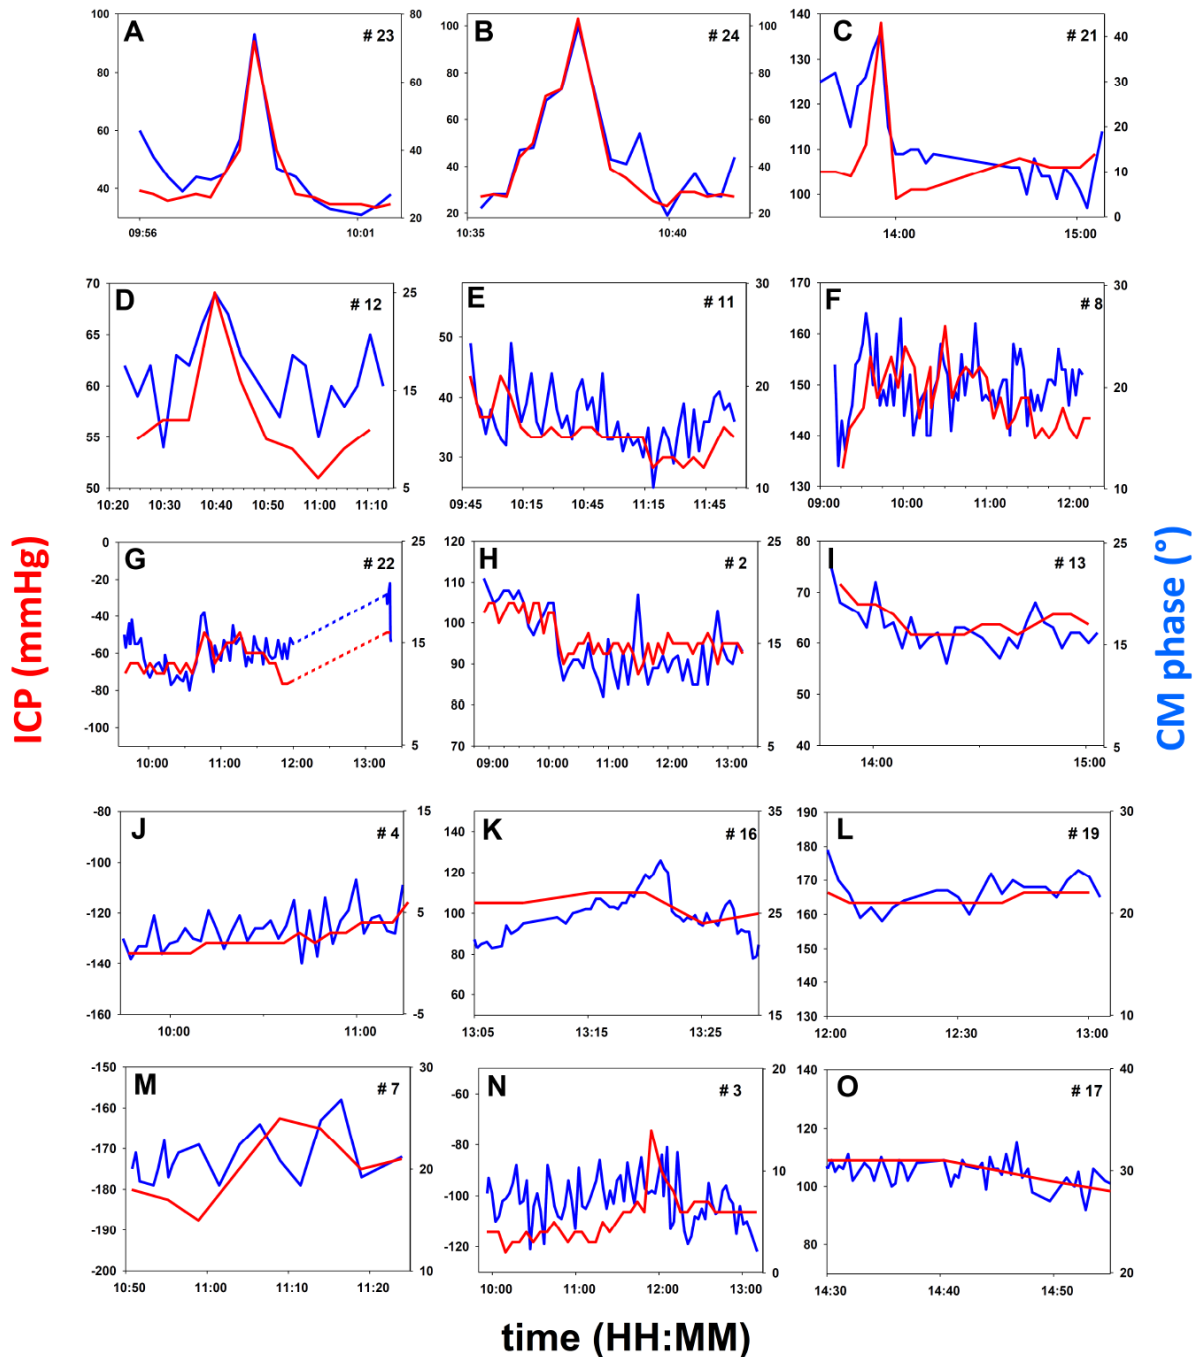

Fig.S3: ICP (red, in mmHg) and CM phase (blue, in degrees). Patient numbers (#n) match those in fig.1C, left column (main text). Diagrams A to L are sorted according to the size of ICP changes over the time course of monitoring, in descending order. In the lowest row (M-O), CM-to-ICP relationships do not reach significance.
